# Supplementary material for: Evening Primrose Extract Modulates TYMS Expression via SP1 Transcription Factor in Malignant Pleural Mesothelioma
Source: MDPI journal article supplement (doi:10.3390/cancers15205003), 2023-10-16

dots Figure 3

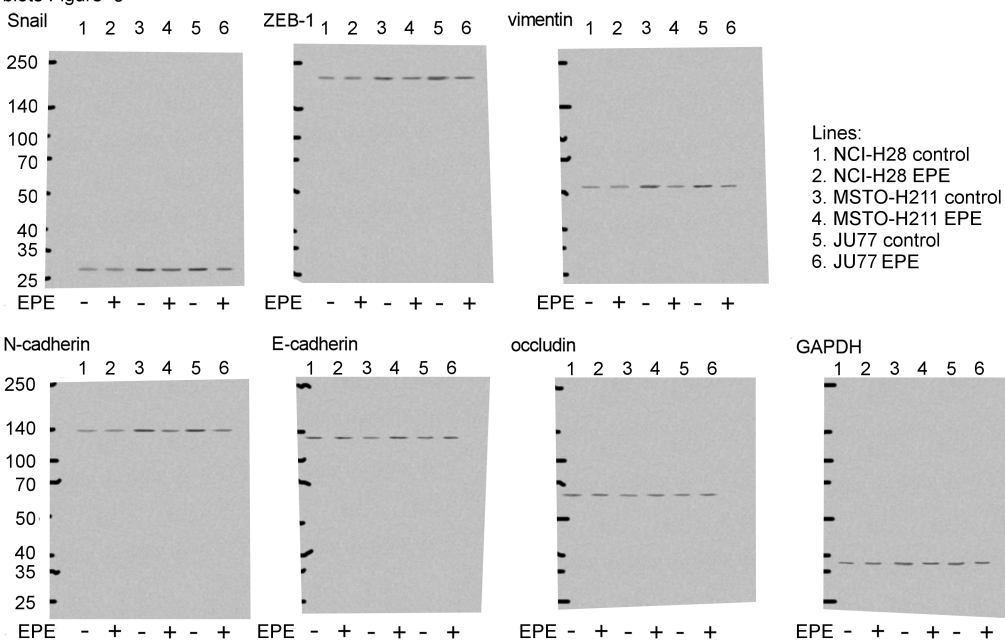

ots Figure 4

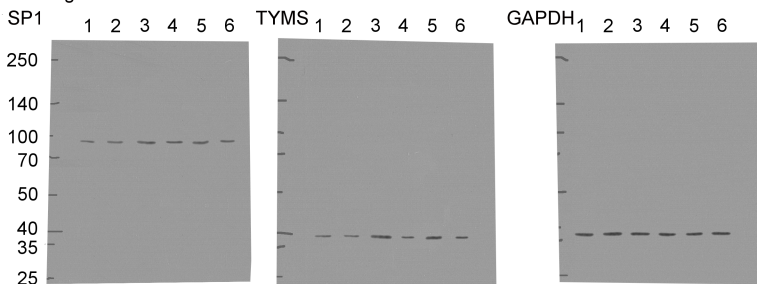

Lines:

1. NCI-H28 control
2. NCI-H28 EPE
3. MSTO-H211 control
4. MSTO-H211 EPE
5. JU77 control
6. JU77 EPE

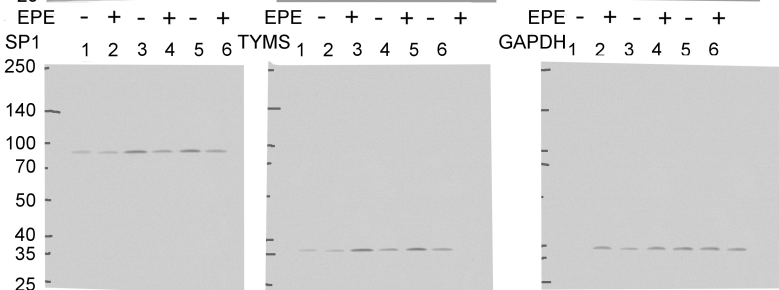

Lines:

1. NCI-H28 control
2. NCI-H28 GA
3. MSTO-H211 control
4. MSTO-H211 GA
5. JU77 control
6. JU77 GA

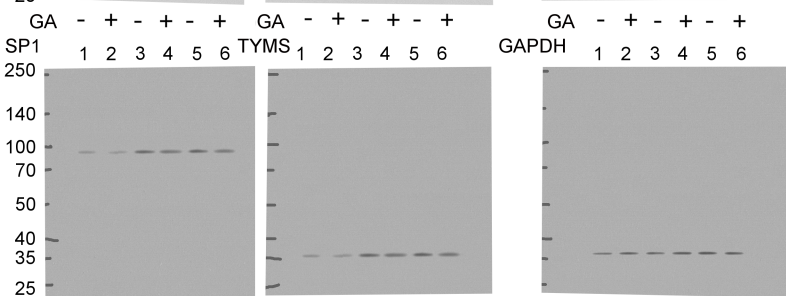

Lines:

1. NCI-H28 control
2. NCI-H28 EA
3. MSTO-H211 control
4. MSTO-H211 EA
5. JU77 control
6. JU77 EA

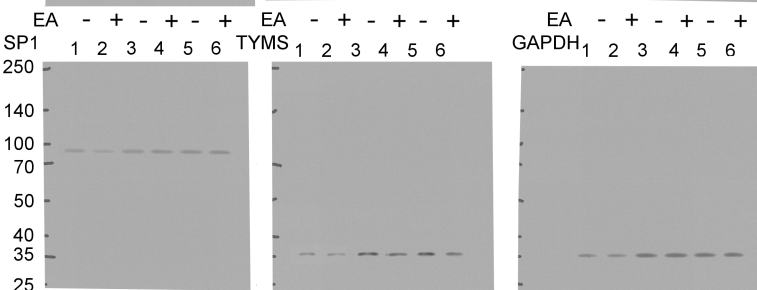

Lines:

1. NCI-H28 control
2. NCI-H28 GA
3. MSTO-H211 control
4. MSTO-H211 GA
5. JU77 control
6. JU77 GA

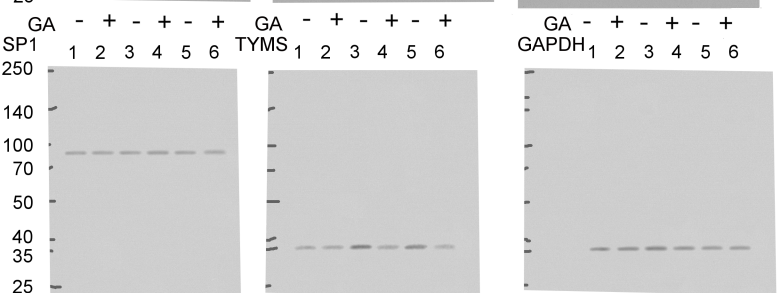

Lines:

1. NCI-H28 control
2. NCI-H28 EA
3. MSTO-H211 control
4. MSTO-H211 EA
5. JU77 control
6. JU77 EA

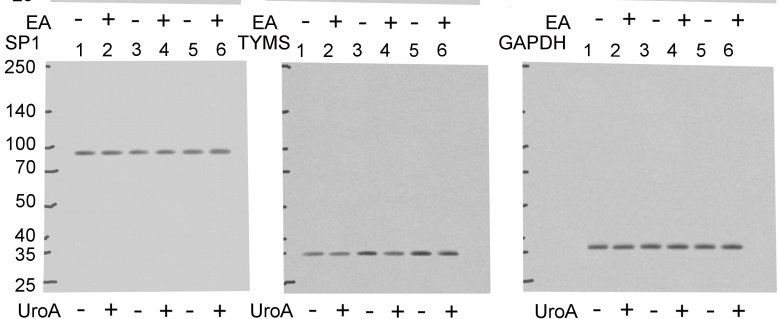

Lines:

1. NCI-H28 control
2. NCI-H28 UroA
3. MSTO-H211 control
4. MSTO-H211 UroA
5. JU77 control
6. JU77 UroA

blots Figure 5

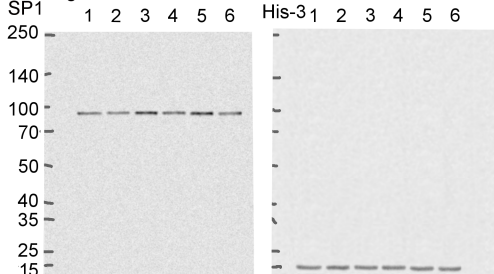

- Lines:
1. NCI-H28 control
  2. NCI-H28 EPE
  3. MSTO-H211 control
  4. MSTO-H211 EPE
  5. JU77 control
  6. JU77 EPE

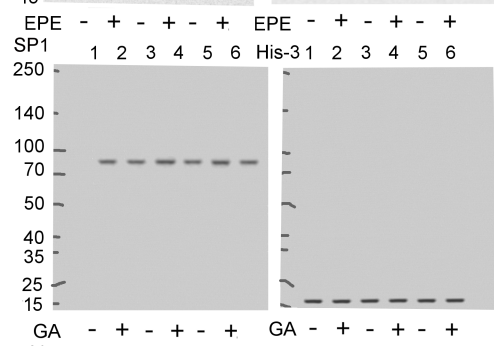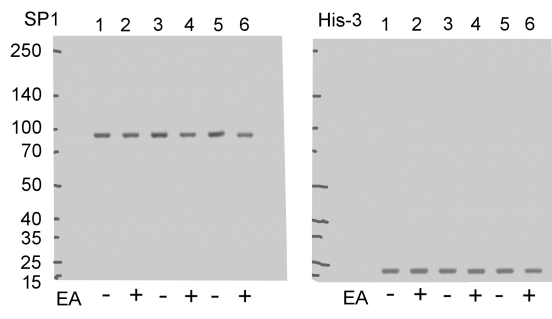

- GA - + - + - +
- 1 2 3 4 5 6
- His-3 1 2 3 4 5 6
- Lines:
1. NCI-H28 control
  2. NCI-H28 GA
  3. MSTO-H211 control
  4. MSTO-H211 GA
  5. JU77 control
  6. JU77 GA

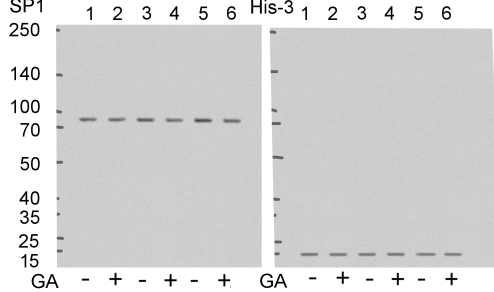

- Lines:
1. NCI-H28 control
  2. NCI-H28 GA
  3. MSTO-H211 control
  4. MSTO-H211 GA
  5. JU77 control
  6. JU77 GA

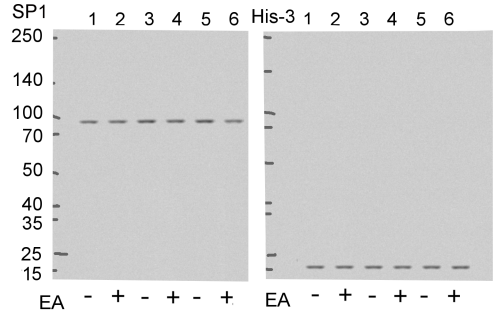

- Lines:
1. NCI-H28 control
  2. NCI-H28 EA
  3. MSTO-H211 control
  4. MSTO-H211 EA
  5. JU77 control
  6. JU77 EA

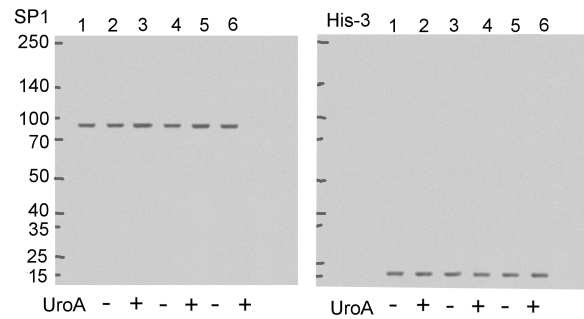

- Lines:
1. NCI-H28 control
  2. NCI-H28 UroA
  3. MSTO-H211 control
  4. MSTO-H211 UroA
  5. JU77 control
  6. JU77 UroA

blots Figure 6

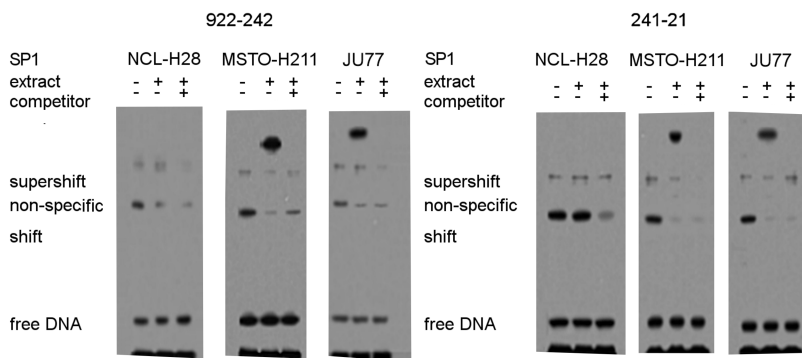

blots Figure 8

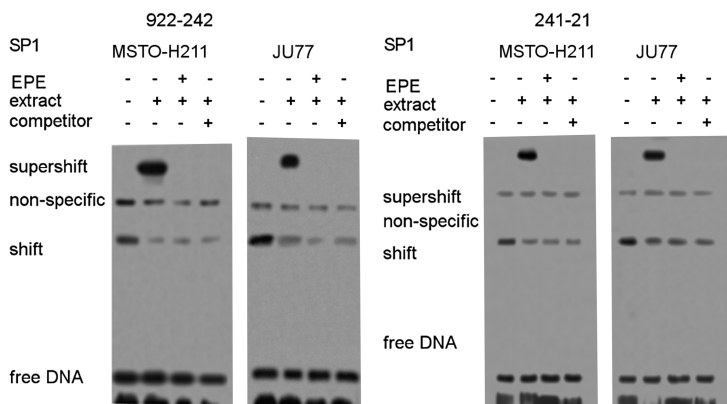



blots Figure 9  
SP1

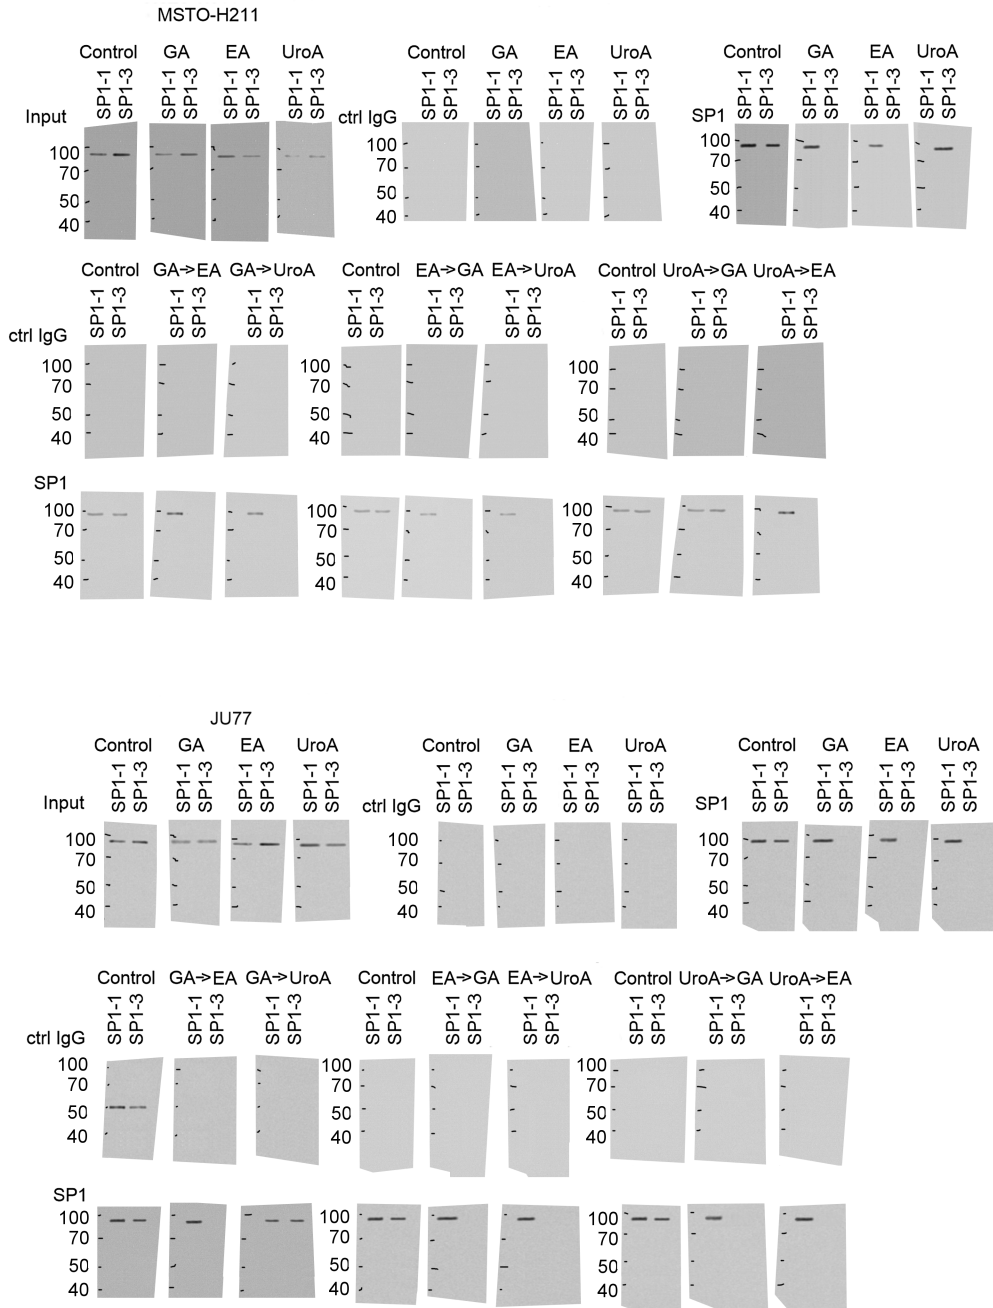

Supplement: s1 [file s1]
