# Supplementary material for: Evening Primrose Extract Modulates TYMS Expression via SP1 Transcription Factor in Malignant Pleural Mesothelioma
Source: MDPI journal article supplement (doi:10.3390/cancers15205003), 2023-10-16
Supplement: s1 [file s1]

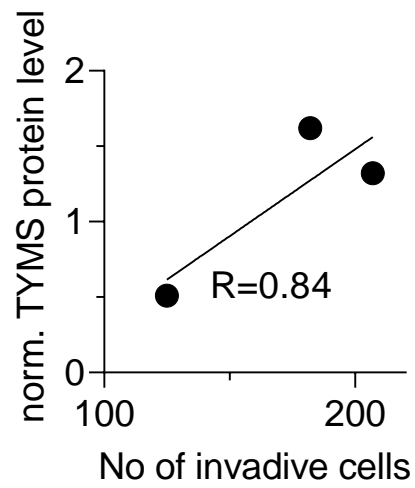

Figure S1. Invasion ability increases in more invasive MPM cell lines. The observed in previous studies invasion ability of MSTO-H211, JU77 and NCI-H28 cell lines [14] were correlated with TYMS protein level. The correlation coefficient (R) between invaded cells and TYMS protein level, calculated in GraphPad Software, amounted to 0.84.
